# Supplementary material for: Heart Failure Disturbs Gut–Blood Barrier and Increases Plasma Trimethylamine, a Toxic Bacterial Metabolite
Source: Int J Mol Sci. 2020 Aug 26;21(17):6161. doi: 10.3390/ijms21176161 (PMC7504565; doi:10.3390/ijms21176161)
Supplement: Supplementary file 1 [file ijms-21-06161-s001.pdf]

## SUPPLEMENTARY MATERIAL

### Supplementary Figures

**Figure S1. (A) Electrocardiograph and (B) echocardiograph recordings in healthy Wistar Kyoto rats (WKY) and spontaneously-hypertensive-heart failure rats (SHHF).** Comparing both electrocardiograms, the main differences visible are QTc, QRS prolongation and depression of ST segment in the SHHF rats. These findings reflect electrocardiographic expression of left ventricular hypertrophy (see also Table 1). A mixed hypertrophy is responsible for the echocardiographic changes in the SHHF rats (see also Table 1).

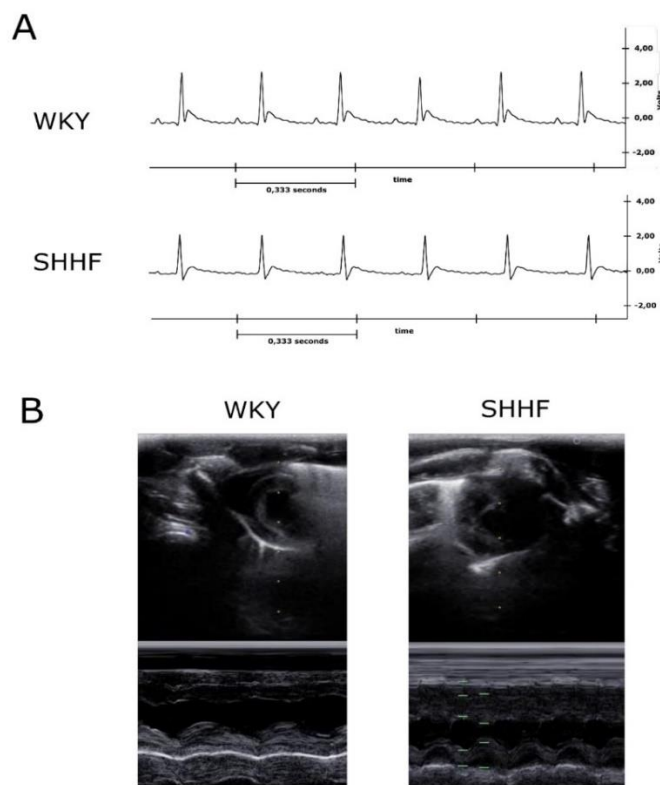

**Figure S2. Histological images of the lungs.** A, B – Lung parenchyma stained with hematoxylin-eosin and viewed at a magnification of x10 (lens). Interstitial edema, thickening and passive congestion of the alveolar walls and interalveolar septum is evident in SHHF.

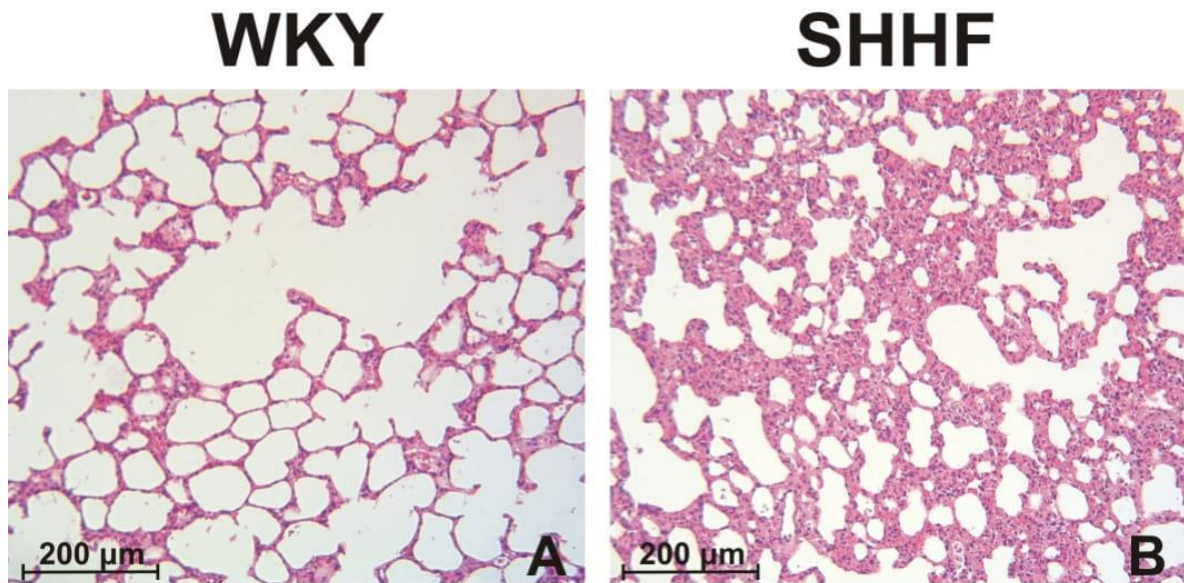

**Figure S3.** Recordings of arterial blood pressure (BP), heart rate (HR) and intestinal blood flow (IBF) in healthy Wistar Kyoto rats (WKY) and spontaneously hypertensive heart failure rats (SHHF).

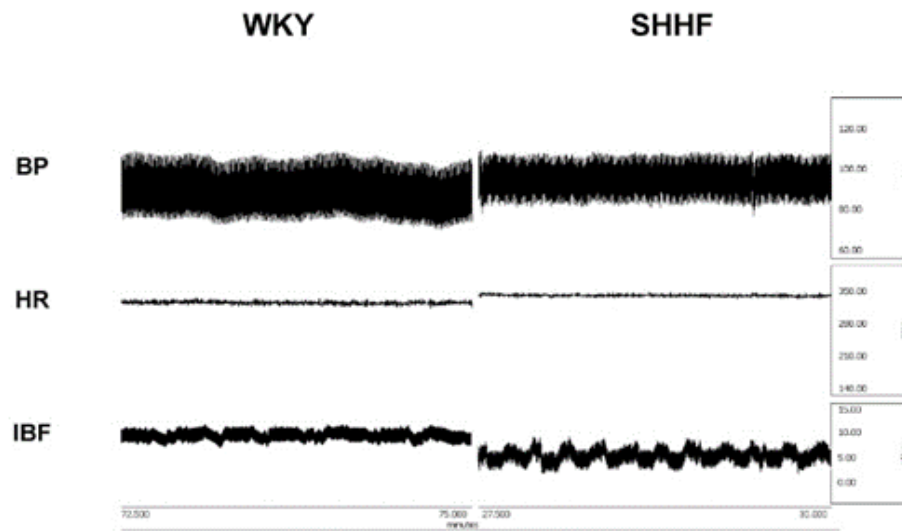

**Figure S4. Uncropped immunoblots from Figure 3.** All additional bands from left or right from a randomly selected protein lysate from the experiment to confirm the proper operation of the immunotransfer device, or positive control lysate chosen according to the antibody's manufacturer recommendation to confirm specificity of the chosen antibody:

- Cldn1: Mouse liver tissue lysates
- Cldn3: Protein lysate from rat's colon or jejunum
- ZO-1 : HepG2
- JAM-A : Protein lysate from rat's colon or jejunum

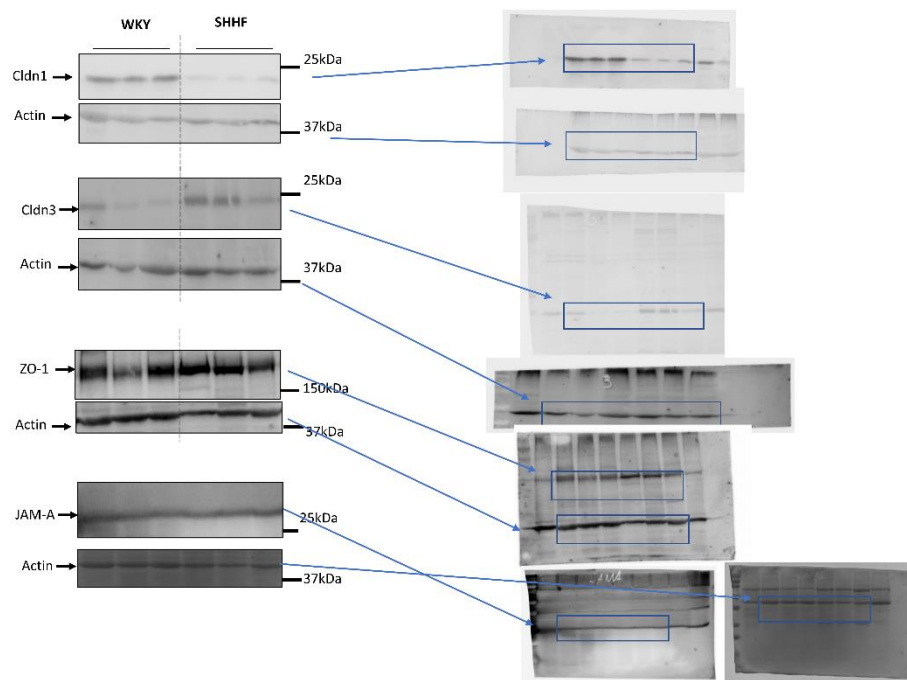

**Figure S5. Uncropped immunoblots from Figure 4.** All additional bands from left or right from a randomly selected protein lysate from the experiment to confirm the proper operation of the immunotransfer device, or positive control lysate chosen according to the antibody's manufacturer recommendation to confirm specificity of the chosen antibody.

- Cldn1: Mouse liver tissue lysates
- Cldn3: Protein lysate from rat's colon or jejunum
- ZO-1 : HepG2
- JAM-A : Protein lysate from rat's colon or jejunum

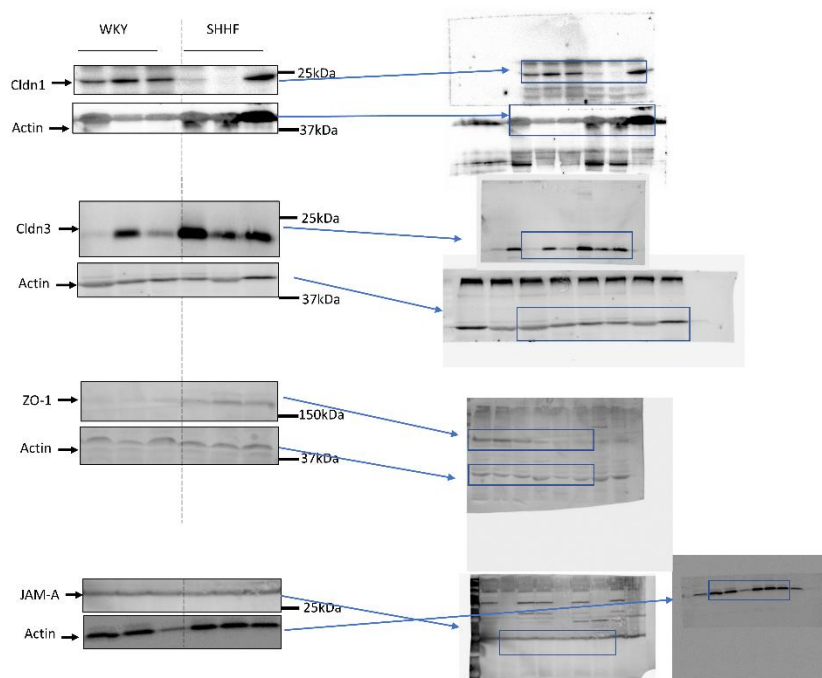

## Supplementary Tables

**Table S1.** List of oligonucleotide primers used for RT-qPCR

| <b>Gene</b>   | <b>Encoded product</b>         | <b>Forward (5'-3')</b>    | <b>Reverse (5'-3')</b>   | <b>PCR product size [bp]</b> | <b>NCBI Accession number</b> |
|---------------|--------------------------------|---------------------------|--------------------------|------------------------------|------------------------------|
| <i>Cldn 1</i> | Claudin 1                      | CCGGGCAGATACAGTGC<br>AAA  | ACCATCAAGGCTCTGG<br>TTGC | 79                           | NM_031699.2                  |
| <i>Cldn 3</i> | Claudin 3                      | ACCATCACCACTACCAAC<br>CG  | CTTCCAGCCTAGCAAG<br>CAGA | 120                          | NM_031700.2                  |
| <i>TJP 1</i>  | Zona Occludens-1               | ATCCCACAAGGAGCCAT<br>TCC  | TAGGGTCACAGTGTGG<br>CAAG | 190                          | NM_001106266.1               |
| <i>F11 R</i>  | Junctional adhesion molecule A | ACTACTGCGAGGCACAG<br>AAC  | CCACGGCTATAGGCAA<br>ACCA | 163                          | NM_053796.1                  |
| <i>Rpl1 9</i> | Ribosomal protein L19          | CAAGCTGAAGGCAGACA<br>AGGC | CGCTTTCGTGCTTCCTT<br>GGT | 87                           | NM_031103.1                  |

**Table S2.** List of antibodies used for Western blot analyses.

| <b>Target protein</b>          | <b>Primary Ab</b>                     | <b>Dilution</b> | <b>Secondary Ab</b>               | <b>Dilution</b> |
|--------------------------------|---------------------------------------|-----------------|-----------------------------------|-----------------|
| Claudin 1                      | Rabbit polyclonal, Abcam ab180158     | 1:1000          | Goat anti-rabbit, Abcam ab97048-1 | 1:10,000        |
| Claudin 3                      | Rabbit polyclonal, Abcam ab15102-50   | 1:2000          | Goat anti-rabbit, Abcam ab97048-1 | 1:10,000        |
| Zona Occludens-1               | Rabbit polyclonal, Abcam ab96587-50   | 1:500           | Goat anti-rabbit, Abcam ab97048-1 | 1:10,000        |
| Junctional adhesion molecule A | Rabbit polyclonal, Abcam ab180821-100 | 1:2000          | Goat anti-rabbit, Abcam ab97048-1 | 1:10,000        |
| Beta-Actin                     | Goat polyclonal, Abcam ab8229-100     | 1:2000          | Donkey anti goat, Abcam ab97107-1 | 1:20,000        |
